# Supplementary material for: The Curse of Knowledge? Education, Corruption, and Politics
Source: Springer Nature journal article supplement (doi:10.1007/s11109-018-9455-7), 2018-03-15
Supplement: MOESM1 [file 15540182]

The Curse of Knowledge?  
*Supplementary material*

March 1, 2018

**Table A:** Countries and number of respondents

| Country             | Respondents |
|---------------------|-------------|
| AU-Australia        | 1432        |
| AT-Austria          | 1033        |
| BE-Belgium          | 2264        |
| CL-Chile            | 1432        |
| TW-Taiwan           | 1875        |
| HR-Croatia          | 1000        |
| CZ-Czech Republic   | 1532        |
| DK-Denmark          | 1758        |
| FI-Finland          | 1505        |
| FR-France           | 1211        |
| GE-Georgia          | 1498        |
| DE-Germany          | 1718        |
| HU-Hungary          | 1007        |
| IS-Iceland          | 1497        |
| IN-India            | 1209        |
| IL-Israel           | 1204        |
| JP-Japan            | 1593        |
| KR-Korea (South)    | 1370        |
| LT-Lithuania        | 1119        |
| NL-Netherlands      | 1638        |
| NO-Norway           | 1459        |
| PH-Philippines      | 1200        |
| PL-Poland           | 2112        |
| RU-Russia           | 1600        |
| SK-Slovak Republic  | 1156        |
| SI-Slovenia         | 1010        |
| ZA-South Africa     | 3124        |
| ES-Spain            | 1755        |
| SE-Sweden           | 899         |
| CH-Switzerland      | 1235        |
| TR-Turkey           | 1509        |
| UK - United Kingdom | 1580        |
| US-United States    | 1264        |
| VE-Venezuela        | 1009        |

**Table B:** Predicting Self-Regarding Attitudes: Individual Components

|                                        | Internal political efficacy 1 |                      | Internal political efficacy 2 |                     | Political interest  |                     | Political media consumption |                      |
|----------------------------------------|-------------------------------|----------------------|-------------------------------|---------------------|---------------------|---------------------|-----------------------------|----------------------|
|                                        | (1)                           | (2)                  | (3)                           | (4)                 | (5)                 | (6)                 | (7)                         | (8)                  |
| Education                              | 0.092***<br>(0.013)           | 0.087***<br>(0.0098) | 0.093***<br>(0.014)           | 0.11***<br>(0.011)  | 0.080***<br>(0.018) | 0.13***<br>(0.0089) | 0.050***<br>(0.011)         | 0.065***<br>(0.0072) |
| Low corruption<br>(Ref: No corruption) | 0.22<br>(0.23)                |                      | -0.032<br>(0.16)              |                     | -0.33<br>(0.25)     |                     | -0.10<br>(0.18)             |                      |
| Moderate corruption                    | -0.021<br>(0.24)              |                      | -0.13<br>(0.21)               |                     | -0.62*<br>(0.25)    |                     | -0.22<br>(0.16)             |                      |
| High corruption                        | -0.14<br>(0.26)               |                      | -0.099<br>(0.30)              |                     | -0.57*<br>(0.26)    |                     | -0.073<br>(0.21)            |                      |
| Very high corruption                   | 0.043<br>(0.33)               |                      | -0.12<br>(0.17)               |                     | -0.93**<br>(0.32)   |                     | -0.50<br>(0.25)             |                      |
| Low corruption * Education             | -0.024<br>(0.013)             |                      | -0.0060<br>(0.010)            |                     | 0.010<br>(0.013)    |                     | 0.0050<br>(0.012)           |                      |
| Moderate corruption * Education        | -0.011<br>(0.013)             |                      | -0.0020<br>(0.013)            |                     | 0.024<br>(0.013)    |                     | 0.012<br>(0.011)            |                      |
| High corruption * Education            | 0.0035<br>(0.014)             |                      | -0.0020<br>(0.018)            |                     | 0.016<br>(0.014)    |                     | -0.0026<br>(0.014)          |                      |
| Very high corruption * Education       | -0.0058<br>(0.019)            |                      | -0.011<br>(0.011)             |                     | 0.031<br>(0.019)    |                     | 0.014<br>(0.017)            |                      |
| Corruption                             |                               | -0.27<br>(0.16)      |                               | 0.069<br>(0.15)     |                     | 0.25<br>(0.16)      |                             | 0.087<br>(0.096)     |
| Corruption * Education                 |                               | 0.0020<br>(0.0081)   |                               | -0.0070<br>(0.0080) |                     | -0.0094<br>(0.0079) |                             | -0.0043<br>(0.0045)  |
| Random intercept (var)                 |                               | 0.57<br>(0.16)       |                               | 0.69<br>(0.20)      |                     | 0.60<br>(0.18)      |                             | 0.26<br>(0.10)       |
| Random slope (var)                     |                               | 0.0016<br>(0.00046)  |                               | 0.0012<br>(0.00034) |                     | 0.0017<br>(0.00042) |                             | 0.00057<br>(0.00021) |
| Individual-level controls              | Yes                           | Yes                  | Yes                           | Yes                 | Yes                 | Yes                 | Yes                         | Yes                  |
| Country-level controls                 |                               | Yes                  |                               | Yes                 |                     | Yes                 |                             | Yes                  |
| Country-fixed effects                  | Yes                           |                      | Yes                           |                     | Yes                 |                     | Yes                         |                      |
| Observations                           | 33643                         | 32163                | 33407                         | 31957               | 34187               | 32981               | 34317                       | 33225                |
| Countries                              | 31                            | 29                   | 31                            | 29                  | 31                  | 29                  | 31                          | 29                   |

*Note:* Robust standard errors in parentheses. All models were estimated using (multilevel) ordinal logistic regression. Individual-level controls include: Income, gender, age, age<sup>2</sup>, place of living, marital status, and incumbent support. Country-level controls include GDP per capita (logged), level of democracy, effective number of parties, and electoral system. \*p<0.05; \*\*p<0.01; \*\*\*p<0.001.

**Table C:** Predicting Institutional Attitudes: Individual Components

|                                        | External political efficacy 1 |                      | External political efficacy 2 |                      | Satisfaction with democracy |                      | Personal profit (politicians) |                      |
|----------------------------------------|-------------------------------|----------------------|-------------------------------|----------------------|-----------------------------|----------------------|-------------------------------|----------------------|
|                                        | (1)                           | (2)                  | (3)                           | (4)                  | (5)                         | (6)                  | (7)                           | (8)                  |
| Education                              | 0.077***<br>(0.011)           | 0.094***<br>(0.0084) | 0.072***<br>(0.0096)          | 0.076***<br>(0.0096) | 0.042**<br>(0.014)          | 0.045***<br>(0.0087) | 0.073***<br>(0.012)           | 0.066***<br>(0.0090) |
| Low corruption<br>(Ref: No corruption) | -0.014<br>(0.14)              |                      | -0.26<br>(0.14)               |                      | -0.21<br>(0.24)             |                      | -0.068<br>(0.23)              |                      |
| Moderate corruption                    | -0.27*<br>(0.12)              |                      | -0.45**<br>(0.16)             |                      | -0.71*<br>(0.35)            |                      | -0.33<br>(0.32)               |                      |
| High corruption                        | -0.13<br>(0.19)               |                      | -0.39*<br>(0.17)              |                      | -1.19**<br>(0.37)           |                      | -0.66<br>(0.38)               |                      |
| Very high corruption                   | -0.22<br>(0.19)               |                      | -0.45<br>(0.27)               |                      | -1.68**<br>(0.50)           |                      | -0.48<br>(0.39)               |                      |
| Low corruption * Education             | -0.016<br>(0.0091)            |                      | -0.0051<br>(0.0096)           |                      | -0.018<br>(0.013)           |                      | -0.024*<br>(0.011)            |                      |
| Moderate corruption * Education        | -0.0091<br>(0.010)            |                      | -0.023*<br>(0.0098)           |                      | -0.029<br>(0.018)           |                      | -0.043**<br>(0.016)           |                      |
| High corruption * Education            | -0.040***<br>(0.011)          |                      | -0.061***<br>(0.011)          |                      | -0.053*<br>(0.019)          |                      | -0.068***<br>(0.019)          |                      |
| Very high corruption * Education       | -0.054***<br>(0.015)          |                      | -0.086***<br>(0.023)          |                      | -0.080*<br>(0.029)          |                      | -0.13***<br>(0.018)           |                      |
| Corruption                             |                               | -0.20<br>(0.22)      |                               | -0.056<br>(0.12)     |                             | -0.36**<br>(0.13)    |                               | -0.089<br>(0.14)     |
| Corruption * Education                 |                               | -0.013*<br>(0.0056)  |                               | -0.011*<br>(0.0057)  |                             | -0.011*<br>(0.0064)  |                               | -0.014*<br>(0.0060)  |
| Random intercept (var)                 |                               | 0.75<br>(0.19)       |                               | 0.53<br>(0.18)       |                             | 0.76<br>(0.27)       |                               | 0.72<br>(0.17)       |
| Random slope (var)                     |                               | 0.00075<br>(0.00028) |                               | 0.0015<br>(0.00044)  |                             | 0.0019<br>(0.00062)  |                               | 0.0010<br>(0.000)    |
| Individual-level controls              | Yes                           | Yes                  | Yes                           | Yes                  | Yes                         | Yes                  | Yes                           | Yes                  |
| Country-level controls                 |                               | Yes                  |                               | Yes                  |                             | Yes                  |                               | Yes                  |
| Country-fixed effects                  | Yes                           |                      | Yes                           |                      | Yes                         |                      | Yes                           |                      |
| Observations                           | 34004                         | 32659                | 34053                         | 32735                | 33687                       | 31961                | 33832                         | 32359                |
| Countries                              | 31                            | 29                   | 31                            | 29                   | 31                          | 29                   | 31                            | 29                   |

*Note:* Robust standard errors in parentheses. All models were estimated using (multilevel) ordinal logistic regression, except for models 5-6 which were estimated with OLS and multilevel regression respectively. Individual-level controls include: Income, gender, age, age<sup>2</sup>, place of living, marital status, and incumbent support. Country-level controls include GDP per capita (logged), level of democracy, effective number of parties, and electoral system. \*p<0.05; \*\*p<0.01; \*\*\*p<0.001.

**Table D:** Multilevel Models with the CPI

|                           | Self-regarding<br>attitudes | Institutional<br>attitudes | Voting              | NIPP                |
|---------------------------|-----------------------------|----------------------------|---------------------|---------------------|
| Education                 | 0.066***<br>(0.010)         | 0.065***<br>(0.0076)       | 0.14***<br>(0.026)  | 0.072***<br>(0.016) |
| Corruption                | -0.055<br>(0.064)           | -0.12*<br>(0.055)          | -0.059<br>(0.14)    | -0.17<br>(0.099)    |
| Corruption * Education    | -0.00031<br>(0.0033)        | -0.0094***<br>(0.0022)     | -0.013*<br>(0.0069) | 0.0039<br>(0.0043)  |
| Random intercept (var)    | 0.16<br>(0.0022)            | 0.20<br>(0.049)            | 1.41<br>(0.66)      | 0.58<br>(0.16)      |
| Random slope (var)        | 0.00043<br>(0.00013)        | 0.00039<br>(0.00011)       | 0.0034<br>(0.0016)  | 0.0013<br>(0.00037) |
| Individual-level controls | Yes                         | Yes                        | Yes                 | Yes                 |
| Country-level controls    | Yes                         | Yes                        | Yes                 | Yes                 |
| Observations              | 30511                       | 30127                      | 29935               | 29647               |
| Countries                 | 29                          | 29                         | 28                  | 29                  |

*Note:* Robust standard errors in parentheses. Models 1-2 were estimated using multilevel regression, model 3 was estimated multilevel logistic regression, and model 4 was estimated using multilevel Poisson regression. Individual-level controls include: Income, gender, age, age<sup>2</sup>, place of living, marital status, and incumbent support. Country-level controls include GDP per capita (logged), level of democracy, effective number of parties, and electoral system. \*p<0.05; \*\*p<0.01; \*\*\*p<0.001.

**Table E: All Observations**

|                                        | Self-regarding attitudes |                      | Institutional attitudes |                      | Voting              |                     | NIPP                 |                      |
|----------------------------------------|--------------------------|----------------------|-------------------------|----------------------|---------------------|---------------------|----------------------|----------------------|
|                                        | (1)                      | (2)                  | (3)                     | (4)                  | (5)                 | (6)                 | (7)                  | (8)                  |
| Education                              | 0.038**<br>(0.013)       | 0.063***<br>(0.0062) | 0.029**<br>(0.0093)     | 0.040***<br>(0.0056) | 0.076***<br>(0.022) | 0.11***<br>(0.018)  | 0.022***<br>(0.0035) | 0.078***<br>(0.0092) |
| Low corruption<br>(Ref: No corruption) | -0.17<br>(0.12)          |                      | -0.25<br>(0.14)         |                      | -0.23<br>(0.23)     |                     | -0.37**<br>(0.14)    |                      |
| Moderate corruption                    | -0.29*<br>(0.13)         |                      | -0.41*<br>(0.16)        |                      | -0.36<br>(0.27)     |                     | -0.45*<br>(0.18)     |                      |
| High corruption                        | -0.34<br>(0.18)          |                      | -0.55**<br>(0.19)       |                      | -0.33<br>(0.25)     |                     | -0.67***<br>(0.18)   |                      |
| Very high corruption                   | -0.39<br>(0.19)          |                      | -0.64**<br>(0.22)       |                      | -0.084<br>(0.22)    |                     | -0.28<br>(0.20)      |                      |
| Low corruption * Education             | 0.0072<br>(0.0062)       |                      | 0.0028<br>(0.0068)      |                      | 0.0041<br>(0.017)   |                     | 0.021**<br>(0.0067)  |                      |
| Moderate corruption * Education        | 0.012<br>(0.0070)        |                      | -0.0086<br>(0.0068)     |                      | -0.00011<br>(0.022) |                     | 0.023*<br>(0.0099)   |                      |
| High corruption * Education            | 0.017<br>(0.011)         |                      | -0.023*<br>(0.0094)     |                      | -0.012<br>(0.021)   |                     | 0.042***<br>(0.0097) |                      |
| Very high corruption * Education       | 0.014<br>(0.012)         |                      | -0.038**<br>(0.011)     |                      | -0.045*<br>(0.019)  |                     | 0.016<br>(0.013)     |                      |
| Corruption                             |                          | -0.00031<br>(0.044)  |                         | -0.011<br>(0.057)    |                     | 0.036<br>(0.15)     |                      | 0.0037<br>(0.087)    |
| Corruption * Education                 |                          | -0.0015<br>(0.0024)  |                         | -0.0049*<br>(0.0024) |                     | -0.012*<br>(0.0057) |                      | -0.0028<br>(0.0037)  |
| Random intercept (var)                 |                          | 0.21<br>(0.062)      |                         | 0.29<br>(0.080)      |                     | 1.67<br>(0.52)      |                      | 0.56<br>(0.15)       |
| Random slope (var)                     |                          | 0.00054<br>(0.00016) |                         | 0.00058<br>(0.00012) |                     | 0.0038<br>(0.0013)  |                      | 0.0013<br>(0.00037)  |
| Individual-level controls              | Yes                      | Yes                  | Yes                     | Yes                  | Yes                 | Yes                 | Yes                  | Yes                  |
| Country-level controls                 |                          | Yes                  |                         | Yes                  |                     | Yes                 |                      | Yes                  |
| Country-fixed effects                  | Yes                      |                      | Yes                     |                      | Yes                 |                     | Yes                  |                      |
| Observations                           | 33923                    | 31393                | 33891                   | 31007                | 32914               | 30864               | 32929                | 30490                |
| Countries                              | 33                       | 30                   | 33                      | 30                   | 32                  | 29                  | 33                   | 30                   |

*Note:* Robust standard errors in parentheses. Models include all observations (not excluding Russia and Venezuela, or respondents who stated that they have over 30 years of education). Models 1-4 were estimated using OLS and multilevel regression. Models 5-6 were estimated using logistic and multilevel logistic regression. Models 7-8 were estimated using Poisson and multilevel Poisson regression. Individual-level controls include: Income, gender, age, age<sup>2</sup>, place of living, marital status, and incumbent support. Country-level controls include GDP per capita (logged), level of democracy, effective number of parties, and electoral system. \*p<0.05; \*\*p<0.01; \*\*\*p<0.001.

**Table F:** Predicting NIPP: Alternative Modeling

|                                        | NIPP               |                     |
|----------------------------------------|--------------------|---------------------|
| Education                              | 0.042**<br>(0.015) | 0.083***<br>(0.011) |
| Low corruption<br>(Ref: No corruption) | -0.33<br>(0.23)    |                     |
| Moderate corruption                    | -0.61**<br>(0.23)  |                     |
| High corruption                        | -0.72*<br>(0.28)   |                     |
| Very high corruption                   | -0.42*<br>(0.19)   |                     |
| Low corruption * Education             | 0.019<br>(0.013)   |                     |
| Moderate corruption * Education        | 0.037**<br>(0.013) |                     |
| High corruption * Education            | 0.048**<br>(0.017) |                     |
| Very high corruption * Education       | 0.029*<br>(0.013)  |                     |
| Corruption                             |                    | -0.12<br>(0.12)     |
| Corruption * Education                 |                    | 0.0026<br>(0.0054)  |
| $\ln(\alpha)$                          | -0.53**<br>(0.16)  | -0.63***<br>(0.030) |
| Random intercept (var)                 |                    | 0.68<br>(0.19)      |
| Random slope (var)                     |                    | 0.0015<br>(0.00044) |
| Individual-level controls              | Yes                | Yes                 |
| Country-level controls                 |                    | Yes                 |
| Country-fixed effects                  | Yes                |                     |
| Observations                           | 31206              | 29647               |
| Countries                              | 31                 | 29                  |

*Note:* Robust standard errors in parentheses. Both models were estimated using (multilevel) negative binomial regression. Individual-level controls include: Income, gender, age, age<sup>2</sup>, place of living, marital status, and incumbent support. Country-level controls include GDP per capita (logged), level of democracy, effective number of parties, and electoral system. \*p<0.05; \*\*p<0.01; \*\*\*p<0.001.

**Table G:** Relative Education Estimates

|                                        | Self-regarding attitudes |                    | Institutional attitudes |                      | Voting              |                     | NIPP              |                     |
|----------------------------------------|--------------------------|--------------------|-------------------------|----------------------|---------------------|---------------------|-------------------|---------------------|
|                                        | (1)                      | (2)                | (3)                     | (4)                  | (5)                 | (6)                 | (7)               | (8)                 |
| Education                              | 0.22***<br>(0.028)       | 0.28***<br>(0.023) | 0.17***<br>(0.021)      | 0.19***<br>(0.018)   | 0.29**<br>(0.10)    | 0.52***<br>(0.073)  | 0.18**<br>(0.059) | 0.33***<br>(0.038)  |
| Low corruption<br>(Ref: No corruption) | -0.064<br>(0.042)        |                    | -0.21***<br>(0.055)     |                      | -0.17*<br>(0.074)   |                     | -0.088<br>(0.067) |                     |
| Moderate corruption                    | -0.12**<br>(0.042)       |                    | -0.52***<br>(0.077)     |                      | -0.35***<br>(0.083) |                     | -0.14*<br>(0.071) |                     |
| High corruption                        | -0.12*<br>(0.045)        |                    | -0.83***<br>(0.092)     |                      | -0.49***<br>(0.080) |                     | -0.10<br>(0.087)  |                     |
| Very high corruption                   | -0.22**<br>(0.070)       |                    | -1.08***<br>(0.11)      |                      | -0.65***<br>(0.071) |                     | -0.046<br>(0.090) |                     |
| Low corruption * Education             | -0.0031<br>(0.022)       |                    | -0.029<br>(0.020)       |                      | 0.036<br>(0.076)    |                     | 0.060<br>(0.051)  |                     |
| Moderate corruption * Education        | 0.022<br>(0.023)         |                    | -0.057*<br>(0.027)      |                      | 0.033<br>(0.095)    |                     | 0.12*<br>(0.053)  |                     |
| High corruption * Education            | 0.014<br>(0.024)         |                    | -0.15***<br>(0.031)     |                      | -0.061<br>(0.087)   |                     | 0.13*<br>(0.063)  |                     |
| Very high corruption * Education       | 0.0098<br>(0.032)        |                    | -0.21***<br>(0.043)     |                      | -0.19*<br>(0.089)   |                     | 0.061<br>(0.051)  |                     |
| Corruption                             |                          | -0.0095<br>(0.048) |                         | -0.19***<br>(0.050)  |                     | -0.15<br>(0.14)     |                   | -0.080<br>(0.072)   |
| Corruption * Education                 |                          | -0.016<br>(0.015)  |                         | -0.039***<br>(0.012) |                     | -0.092**<br>(0.035) |                   | -0.00082<br>(0.019) |
| Random intercept (var)                 |                          | 0.046<br>(0.014)   |                         | 0.12<br>(0.032)      |                     | 0.41<br>(0.12)      |                   | 0.14<br>(0.038)     |
| Random slope (var)                     |                          | 0.0061<br>(0.0017) |                         | 0.0064<br>(0.0019)   |                     | 0.053<br>(0.019)    |                   | 0.017<br>(0.0051)   |
| Individual-level controls              | Yes                      | Yes                | Yes                     | Yes                  | Yes                 | Yes                 | Yes               | Yes                 |
| Country-level controls                 |                          | Yes                |                         | Yes                  |                     | Yes                 |                   | Yes                 |
| Country-fixed effects                  | Yes                      |                    | Yes                     |                      | Yes                 |                     | Yes               |                     |
| Observations                           | 32222                    | 30511              | 32222                   | 30127                | 31176               | 29935               | 31206             | 29647               |
| Countries                              | 31                       | 29                 | 31                      | 29                   | 30                  | 28                  | 31                | 29                  |

*Note:* Robust standard errors in parentheses. *Education* is the relative education measure described in the main text (equation 3). Models 1-4 were estimated using OLS and multilevel regression. Models 5-6 were estimated using logistic and multilevel logistic regression. Models 7-8 were estimated using Poisson and multilevel Poisson regression. Individual-level controls include: Income, gender, age, age<sup>2</sup>, place of living, marital status, and incumbent support. Country-level controls include GDP per capita (logged), level of democracy, effective number of parties, and electoral system. \*p<0.05; \*\*p<0.01; \*\*\*p<0.001.



**Table H:** Imputed Data: Main Models

|                                        | Self-regarding attitudes |                       | Institutional participation |                      | Voting              |                       | Non-institutionalized consumption |                       |
|----------------------------------------|--------------------------|-----------------------|-----------------------------|----------------------|---------------------|-----------------------|-----------------------------------|-----------------------|
|                                        | (1)                      | (2)                   | (3)                         | (4)                  | (5)                 | (6)                   | (7)                               | (8)                   |
| Education                              | 0.043***<br>(0.0058)     | 0.047***<br>(0.0069)  | 0.029***<br>(0.0040)        | 0.027***<br>(0.011)  | 0.047***<br>(0.015) | 0.050***<br>(0.0055)  | 0.049***<br>(0.011)               | 0.055***<br>(0.0067)  |
| Low corruption<br>(Ref: No corruption) | 0.028<br>(0.088)         |                       | -0.13<br>(0.074)            |                      | 0.047<br>(0.20)     |                       | -0.21<br>(0.13)                   |                       |
| Moderate corruption                    | -0.096<br>(0.096)        |                       | -0.44***<br>(0.093)         |                      | -0.24<br>(0.20)     |                       | -0.21<br>(0.13)                   |                       |
| High corruption                        | -0.080<br>(0.10)         |                       | -0.52***<br>(0.11)          |                      | -0.23<br>(0.19)     |                       | -0.10<br>(0.13)                   |                       |
| Very high corruption                   | -0.26<br>(0.14)          |                       | -0.58*<br>(0.14)            |                      | -0.35*<br>(0.16)    |                       | 0.20<br>(0.15)                    |                       |
| Low corruption * Education             | -0.0073<br>(0.0046)      |                       | -0.0064<br>(0.0037)         |                      | -0.016<br>(0.015)   |                       | 0.012<br>(0.0076)                 |                       |
| Moderate corruption * Education        | -0.0036<br>(0.0054)      |                       | -0.0075<br>(0.013)          |                      | -0.0093<br>(0.015)  |                       | 0.014<br>(0.0075)                 |                       |
| High corruption * Education            | -0.0066<br>(0.0058)      |                       | -0.024***<br>(0.0049)       |                      | -0.022<br>(0.015)   |                       | 0.0095<br>(0.0076)                |                       |
| Very high corruption * Education       | -0.0083<br>(0.0086)      |                       | -0.021**<br>(0.0050)        |                      | -0.026*<br>(0.013)  |                       | 0.0047<br>(0.0092)                |                       |
| Corruption                             |                          | -0.038<br>(0.0035)    |                             | -0.11<br>(0.063)     |                     | -0.22<br>(0.17)       |                                   | -0.23<br>(0.18)       |
| Corruption * Education                 |                          | -0.0017<br>(0.0035)   |                             | -0.0043**<br>(0.008) |                     | -0.0076**<br>(0.0025) |                                   | 0.0030<br>(0.0033)    |
| Random intercept (var)                 |                          | 0.17<br>(0.0028)      |                             | 0.098<br>(0.0017)    |                     | 0.69<br>(0.016)       |                                   | 0.30<br>(0.10)        |
| Random slope (var)                     |                          | 0.00051<br>(0.000012) |                             | 0.00052<br>(0.00022) |                     | 0.0018<br>(0.0070)    |                                   | 0.00060<br>(0.000013) |
| Individual-level controls              | Yes                      | Yes                   | Yes                         | Yes                  | Yes                 | Yes                   | Yes                               | Yes                   |
| Country-level controls                 |                          | Yes                   |                             | Yes                  |                     | Yes                   |                                   | Yes                   |
| Country-fixed effects                  | Yes                      |                       | Yes                         |                      | Yes                 |                       | Yes                               |                       |
| Observations                           | 47060                    | 42065                 | 47060                       | 42065                | 45483               | 42065                 | 47060                             | 42065                 |
| Countries                              | 31                       | 29                    | 31                          | 29                   | 31                  | 29                    | 31                                | 29                    |

*Note:* Data imputed using Stata's 'Chained' procedure. Robust standard errors in parentheses. Models 1-4 were estimated using OLS and multilevel regression. Models 5-6 were estimated using logistic and multilevel logistic regression. Models 7-8 were estimated using Poisson and multilevel Poisson regression. Individual-level controls include: Income, gender, age, age<sup>2</sup>, place of living, marital status, and incumbent support. Country-level controls include GDP per capita (logged), level of democracy, effective number of parties, and electoral system. \*p<0.05; \*\*p<0.01; \*\*\*p<0.001.

**Table I:** Multilevel Models: Controlling for country-level inequality

|                           | Self-regarding<br>attitudes | Institutional<br>attitudes | Voting               | NIPP                |
|---------------------------|-----------------------------|----------------------------|----------------------|---------------------|
| Education                 | 0.070***<br>(0.0064)        | 0.048***<br>(0.0052)       | 0.13***<br>(0.018)   | 0.083***<br>(0.011) |
| Corruption                | 0.0028<br>(0.076)           | -0.083<br>(0.075)          | 0.048<br>(0.19)      | -0.12<br>(0.12)     |
| Corruption * Education    | -0.0029<br>(0.0041)         | -0.0089**<br>(0.0033)      | -0.022**<br>(0.0084) | 0.0014<br>(0.0053)  |
| Random intercept (var)    | 0.16<br>(0.0048)            | 0.25<br>(0.094)            | 1.14<br>(0.032)      | 0.62<br>(0.18)      |
| Random slope (var)        | 0.00042<br>(0.00013)        | 0.00049<br>(0.00014)       | 0.0029<br>(0.000091) | 0.0014<br>(0.00042) |
| Individual-level controls | Yes                         | Yes                        | Yes                  | Yes                 |
| Country-level controls    | Yes                         | Yes                        | Yes                  | Yes                 |
| Observations              | 28663                       | 28330                      | 27898                | 27874               |
| Countries                 | 27                          | 27                         | 26                   | 27                  |

*Note:* Robust standard errors in parentheses. Models 1-2 were estimated using multilevel regression, model 3 was estimated multilevel logistic regression, and model 4 was estimated using multilevel Poisson regression. Individual-level controls include: Income, gender, age, age<sup>2</sup>, place of living, marital status, and incumbent support. Country-level controls include GDP per capita (logged), level of democracy, effective number of parties, electoral system, and inequality (WDI Gini). \*p<0.05; \*\*p<0.01; \*\*\*p<0.001.

## Full estimates - Interaction models. From table 2 and 3.

| Individual-level OLS estimates: Self-regarding attitudes | Coef     | SE      |
|----------------------------------------------------------|----------|---------|
| Self-regarding attitudes                                 | .        | (.)     |
| Individual-level corruption = 2, Low corruption          | -0.040   | (0.096) |
| Individual-level corruption = 3, Moderate corruption     | -0.173   | (0.093) |
| Individual-level corruption = 4, High corruption         | -0.164   | (0.106) |
| Individual-level corruption = 5, Very high corruption    | -0.251   | (0.140) |
| Education                                                | 0.056**  | (0.007) |
| Low corruption*Education                                 | -0.002   | (0.005) |
| Moderate corruption*Education                            | 0.005    | (0.005) |
| High*Education                                           | 0.004    | (0.006) |
| Very high corruption*Education                           | 0.003    | (0.008) |
| Income = 2, Medium income                                | 0.012    | (0.018) |
| Income = 3, High income                                  | 0.135**  | (0.023) |
| Age                                                      | 0.016**  | (0.003) |
| Age^2                                                    | -0.000** | (0.000) |
| Sex of Respondent = 2, Female                            | -0.265** | (0.015) |
| Place of living = 2, Urban                               | -0.058** | (0.017) |
| Place of living = 3, Small city                          | -0.088** | (0.021) |
| Place of living = 4, Village                             | -0.162** | (0.024) |
| Place of living = 5, Rural                               | -0.100** | (0.024) |
| Married = 1                                              | 0.014    | (0.012) |
| Incumbent voter = 1                                      | 0.120**  | (0.019) |
| Constant                                                 | -0.755** | (0.155) |
| Country FE                                               | YES      |         |
| Observations                                             | 32,222   |         |
| R-squared                                                | 0.233    |         |

Robust standard errors in parentheses

\*\* p<0.01, \* p<0.05

---

| Multilevel estimates: Self-regarding attitudes    | Coef     | SE      |
|---------------------------------------------------|----------|---------|
| Self-regarding attitudes                          | .        | (.)     |
| Corruption                                        | 0.015    | (0.080) |
| Education                                         | 0.068**  | (0.006) |
| Corruption*Education                              | -0.002   | (0.004) |
| Income = 2, Medium income                         | 0.014    | (0.022) |
| Income = 3, High income                           | 0.146**  | (0.025) |
| Age                                               | 0.021**  | (0.003) |
| Age^2                                             | -0.000** | (0.000) |
| Sex of Respondent = 2, Female                     | -0.270** | (0.018) |
| Place of living = 2, Urban                        | -0.061** | (0.021) |
| Place of living = 3, Small city                   | -0.087** | (0.027) |
| Place of living = 4, Village                      | -0.148** | (0.029) |
| Place of living = 5, Rural                        | -0.096*  | (0.039) |
| Married = 1                                       | 0.015    | (0.014) |
| Incumbent voter = 1                               | 0.134**  | (0.018) |
| Log GDP/capita                                    | 0.353*   | (0.139) |
| Country-level corruption                          | -0.127   | (0.067) |
| Effective number of parties                       | -0.030   | (0.019) |
| Electoral System Type-3 classes = 2, Proportional | -0.042   | (0.073) |
| Electoral System Type-3 classes = 3, Mixed        | -0.133   | (0.124) |
| Observations                                      | 30,511   |         |
| Number of groups                                  | 29       |         |

---

Robust standard errors in parentheses

\*\* p<0.01, \* p<0.05

---

| Individual-level OLS estimates: Institutional attitudes | Coef     | SE      |
|---------------------------------------------------------|----------|---------|
| Institutional attitudes                                 | .        | (.)     |
| Individual-level corruption = 2, Low corruption         | -0.118   | (0.086) |
| Individual-level corruption = 3, Moderate corruption    | -0.320*  | (0.119) |
| Individual-level corruption = 4, High corruption        | -0.374*  | (0.138) |
| Individual-level corruption = 5, Very high corruption   | -0.404*  | (0.162) |
| Education                                               | 0.042**  | (0.004) |
| Education*Low corruption                                | -0.007   | (0.004) |
| Education*Moderate corruption                           | -0.016*  | (0.006) |
| Education*High corruption                               | -0.036** | (0.007) |
| Education*Very high corruption                          | -0.055** | (0.010) |
| Income = 2, Medium income                               | 0.061**  | (0.020) |
| Income = 3, High income                                 | 0.193**  | (0.030) |
| Age                                                     | -0.014** | (0.003) |
| Age^2                                                   | 0.000**  | (0.000) |
| Sex of Respondent = 2, Female                           | 0.035*   | (0.016) |
| Place of living = 2, Urban                              | -0.053** | (0.018) |
| Place of living = 3, Small city                         | -0.085** | (0.017) |
| Place of living = 4, Village                            | -0.083** | (0.024) |
| Place of living = 5, Rural                              | -0.014   | (0.039) |
| Married = 1                                             | 0.052**  | (0.013) |
| Incumbent voter = 1                                     | 0.203**  | (0.027) |
| Constant                                                | 0.333**  | (0.104) |
| Country FE                                              | YES      |         |
| Observations                                            | 32,222   |         |
| R-squared                                               | 0.318    |         |

Robust standard errors in parentheses

\*\* p<0.01, \* p<0.05

---

| Multilevel estimates: Institutional attitudes     | Coef     | SE      |
|---------------------------------------------------|----------|---------|
| Institutional attitudes                           | .        | (.)     |
| Corruption                                        | -0.075   | (0.072) |
| Education                                         | 0.047**  | (0.005) |
| Corruption*Education                              | -0.008*  | (0.003) |
| Income = 2, Medium income                         | 0.039*   | (0.020) |
| Income = 3, High income                           | 0.212**  | (0.028) |
| Age                                               | -0.014** | (0.003) |
| Age^2                                             | 0.000**  | (0.000) |
| Sex of Respondent = 2, Female                     | 0.024    | (0.018) |
| Place of living = 2, Urban                        | -0.065** | (0.022) |
| Place of living = 3, Small city                   | -0.083** | (0.020) |
| Place of living = 4, Village                      | -0.094** | (0.028) |
| Place of living = 5, Rural                        | -0.026   | (0.045) |
| Married = 1                                       | 0.074**  | (0.013) |
| Incumbent voter = 1                               | 0.231**  | (0.036) |
| Log GDP/capita                                    | 0.182    | (0.154) |
| Country-level corruption                          | -0.150   | (0.092) |
| Effective number of parties                       | 0.043    | (0.049) |
| Electoral System Type-3 classes = 2, Proportional | -0.191   | (0.174) |
| Electoral System Type-3 classes = 3, Mixed        | -0.348   | (0.203) |
| Constant                                          | -0.715   | (1.264) |
| Observations                                      | 30,127   |         |
| Number of groups                                  | 29       |         |

---

Robust standard errors in parentheses

\*\* p<0.01, \* p<0.05

---

| Individual-level logistic estimates: Voting           | Coef    | SE      |
|-------------------------------------------------------|---------|---------|
| Voted                                                 | .       | (.)     |
| Individual-level corruption = 2, Low corruption       | -0.218  | (0.241) |
| Individual-level corruption = 3, Moderate corruption  | -0.452  | (0.268) |
| Individual-level corruption = 4, High corruption      | -0.354  | (0.252) |
| Individual-level corruption = 5, Very high corruption | -0.092  | (0.218) |
| Education                                             | 0.073** | (0.023) |
| Education*Low corruption                              | 0.004   | (0.018) |
| Education*Moderate corruption                         | 0.008   | (0.021) |
| Education*High corruption                             | -0.010  | (0.020) |
| Education*Very high corruption                        | -0.043* | (0.019) |
| Income = 2, Medium income                             | 0.197** | (0.063) |
| Income = 3, High income                               | 0.253** | (0.060) |
| Age                                                   | 0.059** | (0.018) |
| Age^2                                                 | -0.000  | (0.000) |
| Sex of Respondent = 2, Female                         | 0.103*  | (0.047) |
| Place of living = 2, Urban                            | 0.080   | (0.067) |
| Place of living = 3, Small city                       | 0.000   | (0.050) |
| Place of living = 4, Village                          | 0.192** | (0.043) |
| Place of living = 5, Rural                            | 0.256** | (0.075) |
| Married = 1                                           | 0.436** | (0.081) |
| Constant                                              | 0.252   | (0.503) |
| Country FE                                            | YES     |         |
| Observations                                          | 31,176  |         |

---

Robust standard errors in parentheses

\*\* p<0.01, \* p<0.05

---

| Multilevel logistic estimates: Voting             | Coef     | SE      |
|---------------------------------------------------|----------|---------|
| Voted                                             | .        | (.)     |
| Corruption                                        | 0.075    | (0.206) |
| Education                                         | 0.124**  | (0.018) |
| Corruption*Education                              | -0.018*  | (0.009) |
| Income = 2, Medium income                         | 0.182**  | (0.041) |
| Income = 3, High income                           | 0.257**  | (0.046) |
| Age                                               | 0.047**  | (0.006) |
| Age^2                                             | -0.000** | (0.000) |
| Sex of Respondent = 2, Female                     | 0.015    | (0.035) |
| Place of living = 2, Urban                        | 0.042    | (0.058) |
| Place of living = 3, Small city                   | 0.001    | (0.048) |
| Place of living = 4, Village                      | 0.201**  | (0.049) |
| Place of living = 5, Rural                        | 0.267**  | (0.087) |
| Married = 1                                       | 0.450**  | (0.036) |
| Log GDP/capita                                    | 0.172    | (0.388) |
| Country-level corruption                          | -0.177   | (0.218) |
| Effective number of parties                       | 0.084    | (0.076) |
| Electoral System Type-3 classes = 2, Proportional | -0.543   | (0.352) |
| Electoral System Type-3 classes = 3, Mixed        | -1.047*  | (0.409) |
| Compulsory voting = 1                             | 0.479    | (0.440) |
| Constant                                          | -1.949   | (3.612) |
| Observations                                      | 29,935   |         |
| Number of groups                                  | 28       |         |

---

Standard errors in parentheses

\*\* p<0.01, \* p<0.05



---

| Individual-level Poisson estimates: Non-institutionalized participation | Coef     | SE      |
|-------------------------------------------------------------------------|----------|---------|
| Non-institutionalized                                                   | .        | (.)     |
| Individual-level corruption = 2, Low corruption                         | -0.308   | (0.220) |
| Individual-level corruption = 3, Moderate corruption                    | -0.566*  | (0.226) |
| Individual-level corruption = 4, High corruption                        | -0.647*  | (0.277) |
| Individual-level corruption = 5, Very high corruption                   | -0.356   | (0.196) |
| Education                                                               | 0.043**  | (0.015) |
| Education*Low corruption                                                | 0.017    | (0.013) |
| Education*Moderate corruption                                           | 0.033*   | (0.013) |
| Education*High corruption                                               | 0.042*   | (0.016) |
| Education*Very high corruption                                          | 0.024    | (0.013) |
| Income = 2, Medium income                                               | 0.008    | (0.026) |
| Income = 3, High income                                                 | 0.132**  | (0.029) |
| Age                                                                     | 0.005    | (0.004) |
| Age^2                                                                   | -0.000** | (0.000) |
| Sex of Respondent = 2, Female                                           | 0.075**  | (0.017) |
| Place of living = 2, Urban                                              | -0.077*  | (0.033) |
| Place of living = 3, Small city                                         | -0.092** | (0.028) |
| Place of living = 4, Village                                            | -0.174** | (0.042) |
| Place of living = 5, Rural                                              | -0.045   | (0.037) |
| Married = 1                                                             | -0.004   | (0.024) |
| Incumbent voter = 1                                                     | -0.048   | (0.063) |
| Constant                                                                | -0.109   | (0.262) |
| Country FE                                                              | YES      |         |
| Observations                                                            | 31,206   |         |

---

Robust standard errors in parentheses

\*\* p<0.01, \* p<0.05

---

| Multilevel Poisson estimates: Non-institutionalized participation | Coef     | SE      |
|-------------------------------------------------------------------|----------|---------|
| Non-institutionalized                                             | .        | (.)     |
| Corruption                                                        | -0.116   | (0.118) |
| Education                                                         | 0.082**  | (0.010) |
| Corruption*Education                                              | 0.002    | (0.005) |
| Income = 2, Medium income                                         | -0.002   | (0.016) |
| Income = 3, High income                                           | 0.120**  | (0.016) |
| Age                                                               | 0.006*   | (0.002) |
| Age^2                                                             | -0.000** | (0.000) |
| Sex of Respondent = 2, Female                                     | 0.068**  | (0.013) |
| Place of living = 2, Urban                                        | -0.110** | (0.019) |
| Place of living = 3, Small city                                   | -0.098** | (0.017) |
| Place of living = 4, Village                                      | -0.177** | (0.018) |
| Place of living = 5, Rural                                        | -0.040   | (0.029) |
| Married = 1                                                       | 0.007    | (0.013) |
| Incumbent voter = 1                                               | -0.057** | (0.014) |
| Log GDP/capita                                                    | 0.392*   | (0.167) |
| Country-level corruption                                          | -0.188*  | (0.094) |
| Effective number of parties                                       | -0.025   | (0.035) |
| Electoral System Type-3 classes = 2, Proportional                 | -0.117   | (0.161) |
| Electoral System Type-3 classes = 3, Mixed                        | -0.741** | (0.190) |
| Constant                                                          | -3.189*  | (1.571) |
| Observations                                                      | 29,647   |         |
| Number of groups                                                  | 29       |         |

---

Standard errors in parentheses

\*\* p<0.01, \* p<0.05
